# Supplementary material for: The nature of the nitrite disorder in Na3ONO2Electronic supplementary information (ESI) available: Calculation of the 15N NMR spectra following the modified order model. See http://www.rsc.org/suppdata/cp/b2/b201336n/
Source: Royal Society of Chemistry journal article supplement (doi:10.1039/b201336n), 2002-06-07
Supplement: addit_info.pdf [file addit_info.pdf]

# **Electronic supplementary material**

**for the manuscript**

## **The nature of the nitrite disorder in $\text{Na}_3\text{ONO}_2$**

**Gerhard Klösters, Leo van Wüllen and Martin Jansen\***

Max-Planck-Institut für Festkörperforschung  
Heisenbergstrasse 1, D-70569 Stuttgart  
Germany

With  $\sigma_{iso} = \frac{1}{3}(\sigma_{11} + \sigma_{22} + \sigma_{33})$  and defining  $\kappa_{st} = \frac{\sigma_{33} - \sigma_{22}}{\sigma_{33} - \sigma_{11}}$ , we can define the CSA tensor

components of the averaged CSA tensor as

$$\langle \sigma_{11} \rangle = \left( \left( \sigma_{11} - \left( \frac{|\kappa - \kappa_{st}| + (\kappa - \kappa_{st})}{2} \right) \left( \sigma_{11} - \frac{\sigma_{22} + \sigma_{11}}{2} \right) \frac{1}{(1 - \kappa_{st})} \right) - \sigma_{iso} \right) \rho + \sigma_{iso}$$

$$\langle \sigma_{22} \rangle = \left( \left( \frac{\sigma_{33} + \sigma_{22}}{2} - \kappa \left( \frac{\sigma_{33} + \sigma_{22}}{2} - \frac{\sigma_{22} + \sigma_{11}}{2} \right) \right) - \sigma_{iso} \right) \rho + \sigma_{iso}$$

$$\langle \sigma_{33} \rangle = \left( \left( \sigma_{33} - \left( \frac{|\kappa - \kappa_{st}| - (\kappa - \kappa_{st})}{2} \right) \left( \sigma_{33} - \frac{\sigma_{33} + \sigma_{22}}{2} \right) \frac{1}{\kappa_{st}} \right) - \sigma_{iso} \right) \rho + \sigma_{iso}$$

The parameter  $\kappa$  ( $0 \leq \kappa \leq 1$ ) denotes the symmetry of the averaged CSA tensor,  $\rho$  ( $0 \leq \rho \leq 1$ ) is related to the overall width of the tensor. With these definitions we can describe all possible CSA tensors for the nitrite ions.

The static CSA tensor for example is obtained setting  $\kappa = \kappa_{st}$  and  $\rho = 1$ ,  $\langle \vec{\sigma} \rangle (\kappa = \kappa_{st}, \rho = 1)$ , as can be easily seen from inspection of the above equation.

With  $\langle \vec{\sigma} \rangle = \sum_{i=1}^6 P_i \vec{\sigma}_i$ , a possible order model consistent with the above definition for the averaged CSA-tensor is given by the occupancies

$$P_1 = \frac{1-\rho}{6} + \left( 1 - \left( \frac{|\kappa - \kappa_{st}| - (\kappa - \kappa_{st})}{4\kappa_{st}} \right) - \left( \frac{|\kappa - \kappa_{st}| + (\kappa - \kappa_{st})}{4(1-\kappa_{st})} \right) \right) \rho$$

$$P_5 = \frac{1-\rho}{6} + \left( \frac{|\kappa - \kappa_{st}| - (\kappa - \kappa_{st})}{4\kappa_{st}} \right) \rho$$

$$P_2 = \frac{1-\rho}{6} + \left( \frac{|\kappa - \kappa_{st}| + (\kappa - \kappa_{st})}{4(1-\kappa_{st})} \right) \rho$$

$$P_3 = P_4 = P_6 = \frac{1-\rho}{6}.$$

So we have three different classes of occupancies,  $P_1 > P_2 > P_3, P_4, P_5, P_6$  or  $P_1 > P_5 > P_3, P_4, P_5, P_2$ , depending on the value of  $\kappa$ . The following plots illustrate the dependencies of the occupancies  $P_i$  on  $\kappa$  and  $\rho$ .

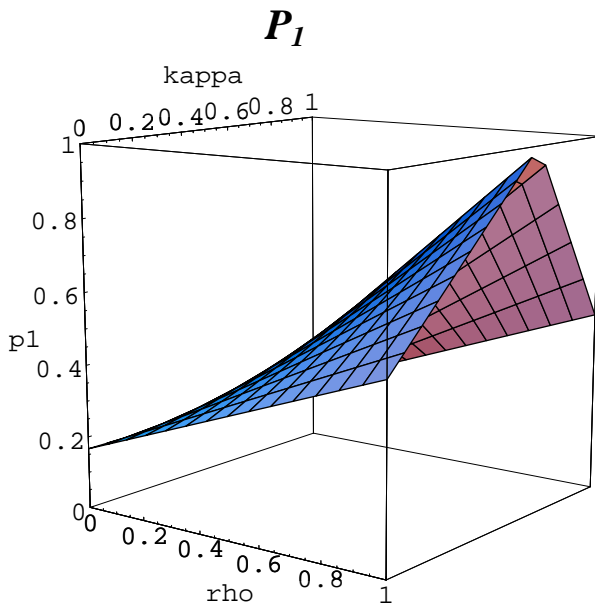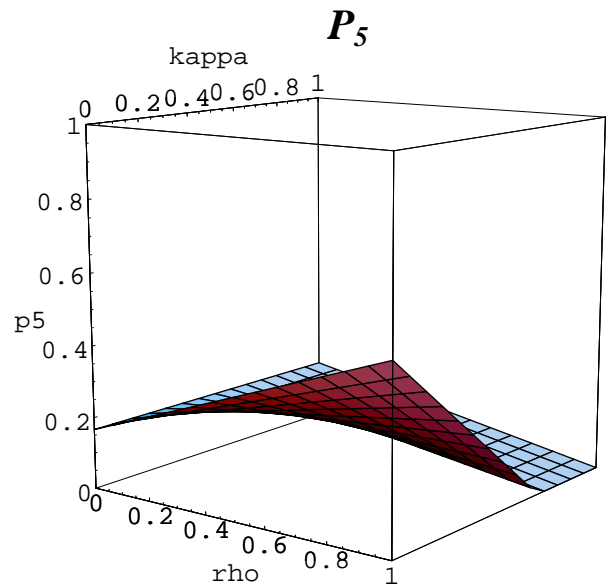

**$P_2$** 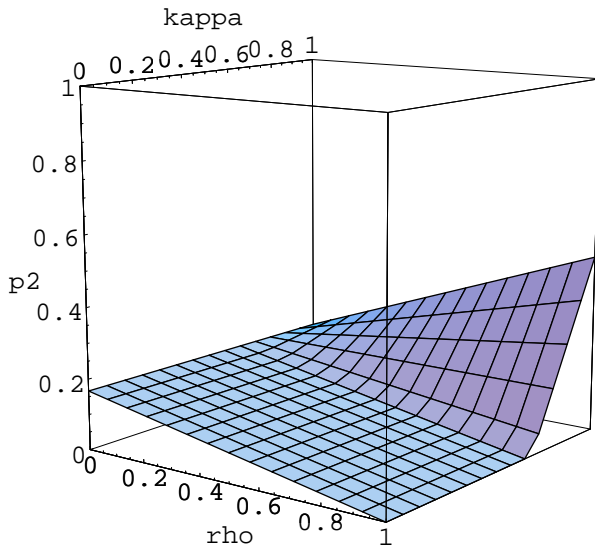 **$P_3, P_4, P_6$** 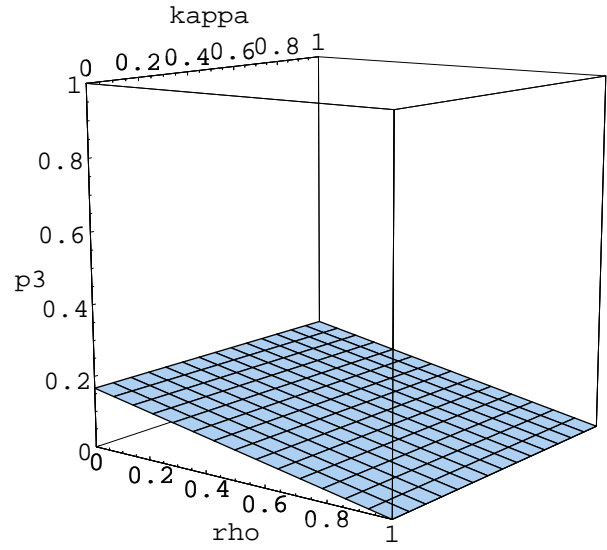

The simulations of the static  $^{15}\text{N}$ -NMR spectra (Fig. 8 of the manuscript) were obtained using the above equations for the occupancies  $P_i$  assuming a gaussian distribution for  $\kappa$  and  $\rho$ :

$$\kappa = \exp\left(\frac{-(\kappa - \kappa_0)^2 \ln(2)}{\Delta^2 \kappa}\right) \quad \text{and} \quad \rho = \exp\left(\frac{-(\rho - \rho_0)^2 \ln(2)}{\Delta^2 \rho}\right).$$

The values used in the simulations are given in the following table.

| <b>T/K</b> | $\kappa_0$ | $\Delta\kappa$ | $\rho_0$ | $\Delta\rho$ |
|------------|------------|----------------|----------|--------------|
| 183        | 0.58       | 0.22           | 0.89     | 0.10         |
| 193        | 0.55       | 0.20           | 0.84     | 0.08         |
| 203        | 0.56       | 0.22           | 0.76     | 0.08         |
| 213        | 0.55       | 0.24           | 0.70     | 0.12         |
| 223        | 0.50       | 0.24           | 0.66     | 0.12         |
| 233        | 0.50       | 0.18           | 0.55     | 0.10         |
| 243        | 0.50       | 0.25           | 0.30     | 0.25         |
| 253        | 0.45       | 0.10           | 0.00     | 0.15         |
